# Supplementary material for: Distinct changes in endosomal composition promote NLRP3 inflammasome activation
Source: PubMed Central journal article supplement (PMC9810532; doi:10.1038/s41590-022-01355-3), 2022-11-28
Supplement: 41590_2022_1355_MOESM2_ESM.pdf [file 41590_2022_1355_MOESM2_ESM.pdf]

## Reporting Summary

Nature Portfolio wishes to improve the reproducibility of the work that we publish. This form provides structure for consistency and transparency in reporting. For further information on Nature Portfolio policies, see our [Editorial Policies](#) and the [Editorial Policy Checklist](#).

### Statistics

For all statistical analyses, confirm that the following items are present in the figure legend, table legend, main text, or Methods section.

n/a Confirmed

- The exact sample size ( $n$ ) for each experimental group/condition, given as a discrete number and unit of measurement
- A statement on whether measurements were taken from distinct samples or whether the same sample was measured repeatedly
- The statistical test(s) used AND whether they are one- or two-sided  
*Only common tests should be described solely by name; describe more complex techniques in the Methods section.*
- A description of all covariates tested
- A description of any assumptions or corrections, such as tests of normality and adjustment for multiple comparisons
- A full description of the statistical parameters including central tendency (e.g. means) or other basic estimates (e.g. regression coefficient) AND variation (e.g. standard deviation) or associated estimates of uncertainty (e.g. confidence intervals)
- For null hypothesis testing, the test statistic (e.g.  $F$ ,  $t$ ,  $r$ ) with confidence intervals, effect sizes, degrees of freedom and  $P$  value noted  
*Give  $P$  values as exact values whenever suitable.*
- For Bayesian analysis, information on the choice of priors and Markov chain Monte Carlo settings
- For hierarchical and complex designs, identification of the appropriate level for tests and full reporting of outcomes
- Estimates of effect sizes (e.g. Cohen's  $d$ , Pearson's  $r$ ), indicating how they were calculated

*Our web collection on [statistics for biologists](#) contains articles on many of the points above.*

### Software and code

Policy information about [availability of computer code](#)

|                 |                                                                                                                                                                                                                                                                                                                                                                                                                                                                                                                                                                                                                                                                                                                                                                                                   |
|-----------------|---------------------------------------------------------------------------------------------------------------------------------------------------------------------------------------------------------------------------------------------------------------------------------------------------------------------------------------------------------------------------------------------------------------------------------------------------------------------------------------------------------------------------------------------------------------------------------------------------------------------------------------------------------------------------------------------------------------------------------------------------------------------------------------------------|
| Data collection | Confocal images were acquired below pixel saturation using Confocal Laser Scanning Microscope Leica TCS SP8 (Leica microsystem) or Nikon Inverted confocal spinning-disk microscope or a Plan-Apochromat 63x or 100x/1.4 oil objective on a Zeiss LSM800 or LSM880 confocal system equipped with an AiryScan module and controlled by the Zen blue software; FACS analysis of Sytox Green uptake was performed using BD FACS Celesta™ Cell Analyzer (BD Bioscience); for FLIM-FRET analysis, samples were excited using a pulsed laser (femtosecond Ti:Sa laser, Chameleon VISION 2 from Coherent, set at 900 nm). Photons were temporally collected using a single-photon sensitive detector (PMA-Hybrid 40; Picoquant) combined with a single photon counting module (TimeHarp 260; Picoquant). |
| Data analysis   | Image J-based Fiji, Fiji co-localization plug-in "Coloc2", "Analyze particles" tool of Fiji, FlowJo 10.8.1 software, GraphPad Prism (GraphPad Software). FLIM data analysis was performed using SymPhoTime 64 (Picoquant).                                                                                                                                                                                                                                                                                                                                                                                                                                                                                                                                                                        |

For manuscripts utilizing custom algorithms or software that are central to the research but not yet described in published literature, software must be made available to editors and reviewers. We strongly encourage code deposition in a community repository (e.g. GitHub). See the Nature Portfolio [guidelines for submitting code & software](#) for further information.

## Data

Policy information about [availability of data](#)

All manuscripts must include a [data availability statement](#). This statement should provide the following information, where applicable:

- Accession codes, unique identifiers, or web links for publicly available datasets
- A description of any restrictions on data availability
- For clinical datasets or third party data, please ensure that the statement adheres to our [policy](#)

All data is available in the main text, extended data figures or the supplementary materials.

## Human research participants

Policy information about [studies involving human research participants and Sex and Gender in Research](#).

Reporting on sex and gender

Population characteristics

Recruitment

Ethics oversight

Note that full information on the approval of the study protocol must also be provided in the manuscript.

## Field-specific reporting

Please select the one below that is the best fit for your research. If you are not sure, read the appropriate sections before making your selection.

Life sciences  Behavioural & social sciences  Ecological, evolutionary & environmental sciences

For a reference copy of the document with all sections, see [nature.com/documents/nr-reporting-summary-flat.pdf](https://www.nature.com/documents/nr-reporting-summary-flat.pdf)

## Life sciences study design

All studies must disclose on these points even when the disclosure is negative.

Sample size

Data exclusions

Replication

Randomization

Blinding

## Reporting for specific materials, systems and methods

We require information from authors about some types of materials, experimental systems and methods used in many studies. Here, indicate whether each material, system or method listed is relevant to your study. If you are not sure if a list item applies to your research, read the appropriate section before selecting a response.

## Materials &amp; experimental systems

## Methods

| n/a                                 | Involved in the study                                           |
|-------------------------------------|-----------------------------------------------------------------|
| <input type="checkbox"/>            | <input checked="" type="checkbox"/> Antibodies                  |
| <input type="checkbox"/>            | <input checked="" type="checkbox"/> Eukaryotic cell lines       |
| <input checked="" type="checkbox"/> | <input type="checkbox"/> Palaeontology and archaeology          |
| <input type="checkbox"/>            | <input checked="" type="checkbox"/> Animals and other organisms |
| <input checked="" type="checkbox"/> | <input type="checkbox"/> Clinical data                          |
| <input checked="" type="checkbox"/> | <input type="checkbox"/> Dual use research of concern           |

| n/a                                 | Involved in the study                              |
|-------------------------------------|----------------------------------------------------|
| <input checked="" type="checkbox"/> | <input type="checkbox"/> ChIP-seq                  |
| <input type="checkbox"/>            | <input checked="" type="checkbox"/> Flow cytometry |
| <input checked="" type="checkbox"/> | <input type="checkbox"/> MRI-based neuroimaging    |

## Antibodies

## Antibodies used

Antibodies used in this study for immunofluorescence analysis are: goat anti-human IL-1 $\beta$  antibody (AF-201-NA, R&D Systems; 1/1000); mouse anti-human Caspase1 antibody (06-503, Merck Millipore; 1/1000); rabbit anti-mouse IL-1 $\beta$  antibody (5129-100, BioVision; 1/1000); mouse anti-mouse Caspase1 p20 (AG-20B-0042-C100, AdipoGen; 1/1000); rabbit anti-ASC antibody (sc-22514, Santa Cruz Biotechnology; 1/1000), mouse anti-NLRP3 antibody (G-20B-0014-C100, AdipoGen; 1/3000); rabbit anti-GAPDH (G9545, Sigma-Aldrich; 1/5000); mouse anti-Tubulin (T9026, Sigma-Aldrich; 1/5000); rabbit anti-ARFRP1 (PA5-50606, ThermoFisher Scientific; 1/2000) and mouse anti-Flag antibody (F1804, Sigma-Aldrich; 1/5000); rabbit anti-OSBP (11096-1-AP, Proteintech; 1/2000); mouse anti-PI4KII alpha (sc-390026, Santa Cruz Biotechnology; 1/1000); rabbit anti-PI4KII $\beta$  (A17719, ABclonal; 1/1000) and mouse anti-PI4KII $\beta$  (611816, BD Bioscience; 1/1000). Rabbit polyclonal antibodies against VAPA (; 1/6000) and VAPB (1/4000) were generated as described in Venditti et al, 2019 (PMID: 30659099). HRP-conjugated rabbit anti-goat IgG (31402, ThermoFisher Scientific, 1/10000), HRP-conjugated goat anti-rabbit IgG (111-035-144, Jackson ImmunoResearch, 1/10000); goat anti-mouse IgG (31430, ThermoFisher Scientific, 1/10000).

Antibodies used in this study for immunoblotting analysis are: Rabbit anti-TGN46 (13573-1-AP, ProteinTech, 1/300); Sheep anti-human TGN46 (AHP500G, Bio-rad, 1/50); Sheep anti-TGN38 (AHP499G, Bio-rad, 1/50); Rabbit anti-GCC2 (HPA035849, Sigma-Aldrich, 1/200); Rabbit anti-GCC1 (HPA021323, Sigma-Aldrich, 1/100); Mouse anti-human p230 (611280, BD Bioscience, 1/100); Mouse anti-Golgin97 (A-21270, ThermoFisher Scientific, 1/100); Mouse anti-EEA1 (610456, BD Bioscience, 1/100); Rabbit anti-EEA1 (3288S, Cell Signaling Technology, 1/100); Mouse anti-PI4P (Z-P004, Echelon Biosciences, 1/100); Rabbit anti-Golgin97 (Home-made, PMID30659099, 1/100); Alexa Fluor488 goat anti-mouse IgG (A11029, ThermoFisher Scientific, 1/1000); Alexa Fluor594 goat anti-mouse IgG (A11005, ThermoFisher Scientific, 1/1000); Alexa Fluor488 goat anti-mouse IgM (A21042, ThermoFisher Scientific, 1/1000); Alexa Fluor594 goat anti-mouse IgM (A11029, ThermoFisher Scientific, 1/1000); Alexa Fluor488 goat anti-rabbit IgG (A11034, ThermoFisher Scientific, 1/1000); Alexa Fluor594 goat anti-rabbit IgG (A11037, ThermoFisher Scientific, 1/1000); Alexa Fluor647 goat anti-rabbit IgG (A21246, ThermoFisher Scientific, 1/1000) and Alexa Fluor488 donkey anti-sheep IgG (A11015, ThermoFisher Scientific, 1/1000).

## Validation

Goat anti-human IL-1 $\beta$  antibody (AF-201-NA, R&D Systems); mouse anti-human Caspase-1 antibody (06-503, Merck Millipore); rabbit anti-mouse IL-1 $\beta$  antibody (5129-100, BioVision); mouse anti-mouse Caspase-1 p20 (AG-20B-0042-C100, AdipoGen); rabbit anti-ASC antibody (sc-22514, Santa Cruz Biotechnology), mouse anti-NLRP3 antibody (G-20B-0014-C100, AdipoGen) were widely used in inflammasome-related studies, including our previous study (PMID: 28716882); rabbit anti-VAPA (home-made); rabbit anti-VAPB (home-made); rabbit anti-OSBP (11096-1-AP, Proteintech); mouse anti-PI4KII alpha(sc-390026, Santa Cruz Biotechnology), rabbit anti-PI4KII beta (A17719, ABclonal) and mouse anti-PI4KII $\beta$  antibody (611816, BD Bioscience) were validated in this study in Fig. 3c, 3d, Extended Data Fig. 3b, 3e; rabbit anti-ARFRP1 (PA5-50606, ThermoFisher Scientific); rabbit anti-GCC2 antibody (HPA035849, Sigma-Aldrich); rabbit anti-GCC1 antibody (HPA021323, Sigma-Aldrich); mouse anti-human p230 (611280, BD Bioscience) and mouse anti-Golgin97 (A-21270, ThermoFisher Scientific) were validated in previous study (PMID: 31575603); mouse anti-EEA1 (610456, BD Bioscience), rabbit anti-EEA1 (3288S, Cell Signaling Technology), sheep anti-human TGN46 (AHP500GT, Bio-rad) and rabbit anti-Golgin97 were validated by previous studies (including PMID: 30659099); mouse anti-PI4P (Z-P004, Echelon Biosciences) was validated by previous studies (including PMID: 30659099 and PMID: 19508231).

## Eukaryotic cell lines

Policy information about [cell lines and Sex and Gender in Research](#)

## Cell line source(s)

THP-1 cells was from ATCC; HEK293t cells (ATCC, CRL-3216) was from DKFZ Heidelberg; Immortalized bone marrow-derived macrophages (iBMDMs) cell line was obtained from Dr. Eicke Latz (University of Bonn, Germany). mApple-tagged RAB5 stably-expressing HeLa cell line was provided by Dr. Anne Sprang (BIOZENTRUM, University of Basel, Switzerland). HeLa WT and HeLa VAP dKO cell lines<sup>10</sup> were a generous gift from Dr. Pietro De Camilli (Yale University School of Medicine, New Haven, CT).

## Authentication

THP-1 cells and HEK293t cells have been authenticated using Short Tandem Repeat (STR) performed by LGC Standards, UK. HeLa cells and iBMDMs were not authenticated.

## Mycoplasma contamination

All the cells used in this study were tested Mycoplasma-negative.

Commonly misidentified lines  
(See [ICLAC](#) register)

No misidentified cell lines were used in this study.

## Animals and other research organisms

Policy information about [studies involving animals](#); [ARRIVE guidelines](#) recommended for reporting animal research, and [Sex and Gender in Research](#)

|                         |                                                                                                                                                                                                                                                                                                                                |
|-------------------------|--------------------------------------------------------------------------------------------------------------------------------------------------------------------------------------------------------------------------------------------------------------------------------------------------------------------------------|
| Laboratory animals      | Mice were housed under specific pathogen-free conditions with controlled temperature (19-23°C) and humidity (40-60%) on a 12-h light/dark cycle with unrestricted access to water and standard laboratory chow. Arfrp1-floxed and myeloid-specific Arfrp1 knockout mice on C57BL/6J background at age 6-8 weeks-old were used. |
| Wild animals            | No wild animals were used in this study.                                                                                                                                                                                                                                                                                       |
| Reporting on sex        | Both males and females were used in this study.                                                                                                                                                                                                                                                                                |
| Field-collected samples | No field-collected samples were used in this study.                                                                                                                                                                                                                                                                            |
| Ethics oversight        | Maintenance and animal experimentation were in accordance with the local ethical committee (Com'Eth) in compliance with the European legislation on care and use of laboratory animals (La cellule AFIS (Animaux utilisés à des Fins Scientifiques): APAFIS#30865-2021040115389039 v3)                                         |

Note that full information on the approval of the study protocol must also be provided in the manuscript.

## Flow Cytometry

### Plots

Confirm that:

- The axis labels state the marker and fluorochrome used (e.g. CD4-FITC).
- The axis scales are clearly visible. Include numbers along axes only for bottom left plot of group (a 'group' is an analysis of identical markers).
- All plots are contour plots with outliers or pseudocolor plots.
- A numerical value for number of cells or percentage (with statistics) is provided.

### Methodology

|                           |                                                                                                                                                                                                     |
|---------------------------|-----------------------------------------------------------------------------------------------------------------------------------------------------------------------------------------------------|
| Sample preparation        | After treatment, cells were detached with 5 mM EDTA and incubated with SYTOX™ Green (S7020, ThermoFisher Scientific) at 1/8000 dilution.                                                            |
| Instrument                | BD FACS Celesta™ Cell Analyzer (BD Bioscience)                                                                                                                                                      |
| Software                  | FlowJo 10.8.1 Software                                                                                                                                                                              |
| Cell population abundance | 80~90% of VAP dKO, OSBP KO, ARFRP1 or SYS1 KO THP-1 cells became SYTOX Green-positive when treated with 1 µg/ml LPS or Pam3CSK4; while WT cells showed less than 10% of SYTOX Green-positive cells. |
| Gating strategy           | Forward and side scatter and SYTOX Green signal-based gating                                                                                                                                        |

- Tick this box to confirm that a figure exemplifying the gating strategy is provided in the Supplementary Information.
