# Supplementary material for: Distinct changes in endosomal composition promote NLRP3 inflammasome activation
Source: PubMed Central journal article supplement (PMC9810532; doi:10.1038/s41590-022-01355-3), 2022-11-28
Supplement: 41590_2022_1355_MOESM8_ESM.pdf [file 41590_2022_1355_MOESM8_ESM.pdf]

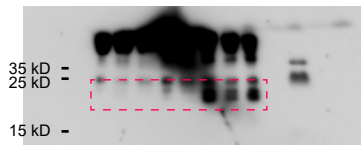

Fig. 3c\_IL-1β p17 (Sup)

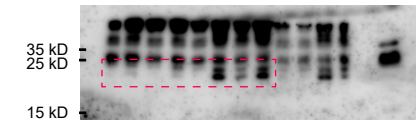

Fig. 3c\_CASP1 p20 (Sup)

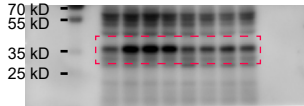

Fig. 3c\_IL-1β p31 (Lys)

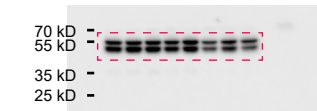

Fig. 3c\_CASP1 p45 (Lys)

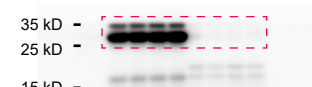

Fig. 3c\_VAPA (Lys)

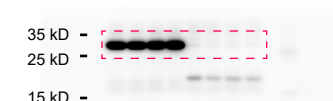

Fig. 3c\_VAPB (Lys)

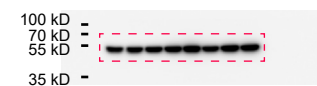

Fig. 3c\_Tubulin (Lys)

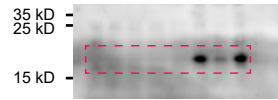

Fig. 3d\_IL-1β p17 (Sup)

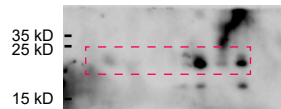

Fig. 3d\_CASP1 p20 (Sup)

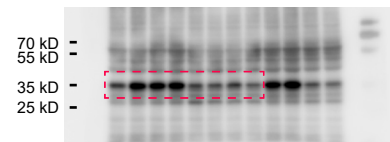

Fig. 3d\_IL-1β p31 (Lys)

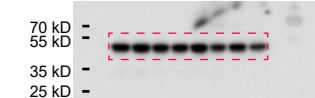

Fig. 3d\_CASP1 p45 (Lys)

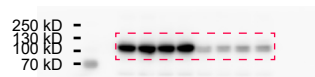

Fig. 3d\_OSBP (Lys)

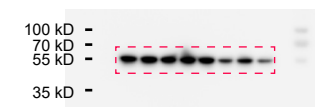

Fig. 3d\_Tubulin (Lys)

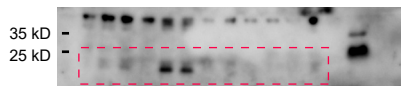

Fig. 3e\_CASP1 p20 (Sup)

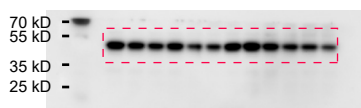

Fig. 3e\_CASP1 p45 (Lys)

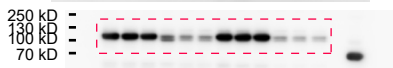

Fig. 3e\_OSBP (Lys)

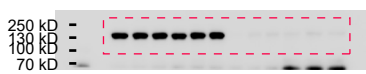

Fig. 3e\_NLRP3 (Lys)

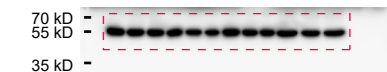

Fig. 3e\_Tubulin (Lys)

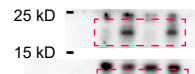

Fig. 3f\_IL-1β p17 (Sup)

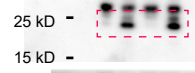

Fig. 3f\_CASP1 p20 (Sup)

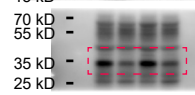

Fig. 3f\_IL-1β p31 (Lys)

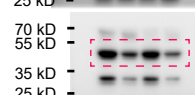

Fig. 3f\_CASP1 p45 (Lys)

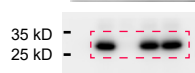

Fig. 3f\_VAPA (Lys)

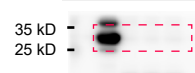

Fig. 3f\_VAPB (Lys)

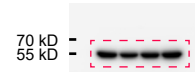

Fig. 3f\_Tubulin (Lys)
